# Supplementary material for: The phosphatase PTEN links platelets with immune regulatory functions of mouse T follicular helper cells
Source: PubMed Central journal article supplement (PMC9120038; doi:10.1038/s41467-022-30444-y), 2022-05-19
Supplement: 41467_2022_30444_MOESM1_ESM.pdf [file 41467_2022_30444_MOESM1_ESM.pdf]

## The phosphatase PTEN links platelets with immune regulatory functions of T follicular helper cells

### Inventory of Supporting Information

#### 1. Supplementary Figures and figure legends

**Supplementary Figure 1** *Pten*<sup>fl/fl</sup>*Pf4-Cre* mice display normal B cell development in bone marrow.

**Supplementary Figure 2** Expansion of IFN $\gamma$ <sup>+</sup>, IL-4<sup>+</sup>, IL17<sup>+</sup> T subsets in pLNs from *Pten*<sup>fl/fl</sup>*Pf4-Cre* mice.

**Supplementary Figure 3** Altered T cell differentiation and excessive Tfh cell response in the spleens of *Pten*<sup>fl/fl</sup>*Pf4-Cre* mice.

**Supplementary Figure 4** *Pten*<sup>fl/fl</sup>*Pf4-Cre* mice displayed normal homeostasis of splenic DCs.

**Supplementary Figure 5** The frequencies of GFP-positive cells in the indicated lineages.

**Supplementary Figure 6** Nonspecific PTEN deficiency in T/B subsets has a very limited effect on indicated cell populations.

**Supplementary Figure 7** The expansion of activate, Th1, Tfh and GC-B subsets is cell-extrinsic.

**Supplementary Figure 8** The production and secretion of cytokines in *Pten*<sup>fl/fl</sup> and *Pten*<sup>fl/fl</sup>*Pf4-Cre* platelets.

**Supplementary Figure 9-11** Gating Strategy used for flow cytometric analysis in the manuscript figures.

#### 2. Supplementary Table 1

#### 3. Source data for the blot in Supplementary Figure 8b

1 **Supplementary Figures and figure legends**

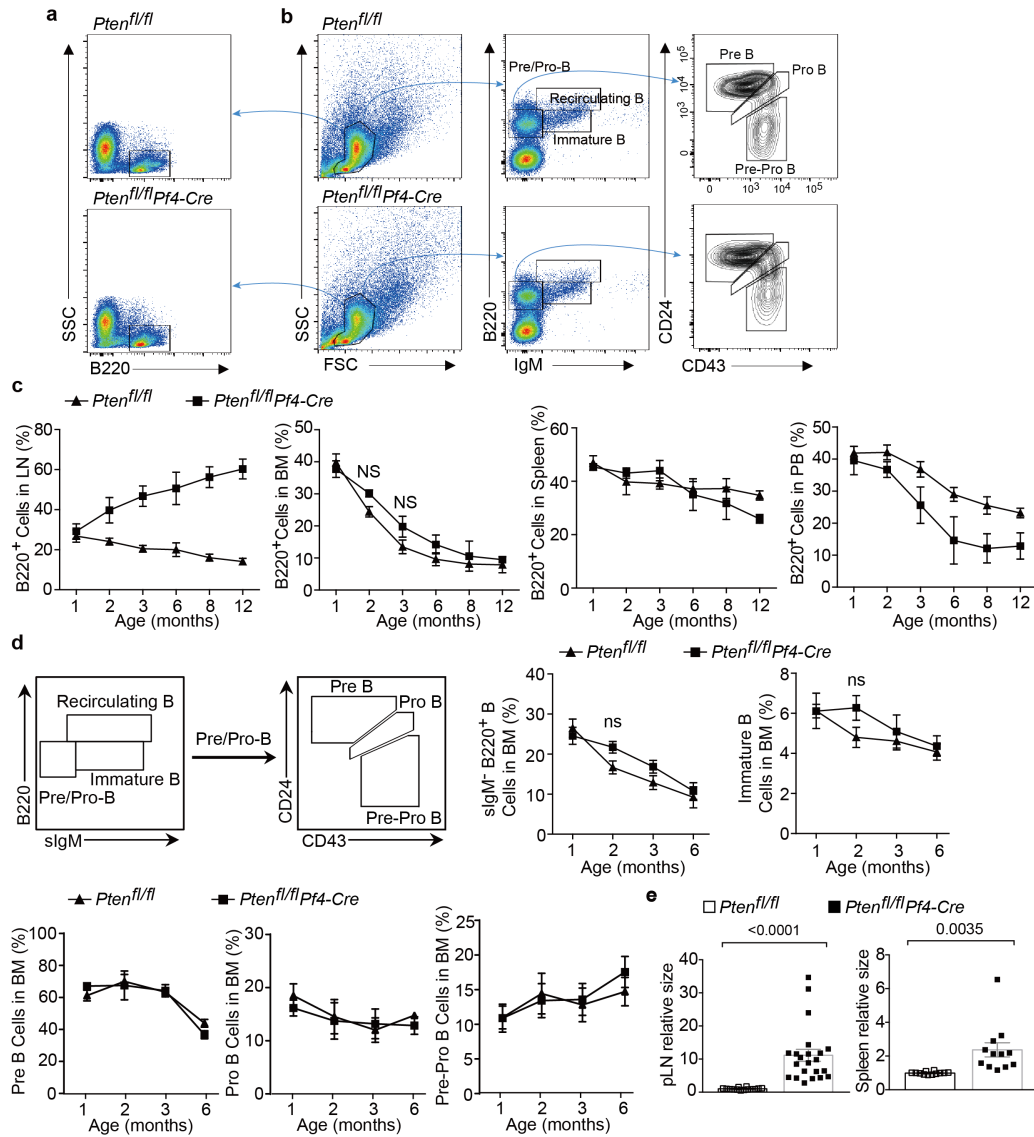

2

**Supplementary Figure. 1**

3 **Supplementary Figure 1 *Pten<sup>fl/fl</sup> Pf4-Cre* mice display normal B cell development in bone**  
 4 **marrow.** The mice of indicated ages were subjected for analysis (a-d). **a** The gating panels  
 5 correspond to FACS data panels in **c**. **b** The gating panels correspond to FACS data panels in **d**. **c**  
 6 Frequencies of B220<sup>+</sup> B cells in pLNs, bone marrow (BM), spleen (SP) and peripheral blood (PB)  
 7 from *Pten<sup>fl/fl</sup>* or *Pten<sup>fl/fl</sup> Pf4-Cre* mice at the indicated ages. **d** Frequencies of Pre/Pro B (sIgM<sup>-</sup>  
 8 B220<sup>+</sup>), immature B (sIgM<sup>+</sup>B220<sup>+</sup>), recirculating B cells (sIgM<sup>+</sup>B220<sup>hi</sup>) and committed B-lineage  
 9 progenitors in bone marrow, including sIgM<sup>-</sup>B220<sup>+</sup>CD24<sup>+</sup>CD43<sup>-</sup> Pre B cells, sIgM<sup>-</sup>  
 10 B220<sup>+</sup>CD24<sup>+</sup>CD43<sup>+</sup> Pro B cells and sIgM<sup>-</sup>B220<sup>+</sup>CD24<sup>-</sup>CD43<sup>+</sup> Pre-Pro B cells from mice at the  
 11 indicated ages. **e** Statistical analysis of the relative size of pLNs and spleens from *Pten<sup>fl/fl</sup>* (n=14)  
 12 or *Pten<sup>fl/fl</sup> Pf4-Cre* mice (n=22), age and sex matched 6-month-old mice were used. Data are  
 13 representative of three independent experiments and obtained from 3-6 mice for each genotype.  
 14 Data (c-e) are presented as mean ± s.e.m. ns, not significant. (two-tailed t-test). Source data are  
 15 provided as a Source Data file.

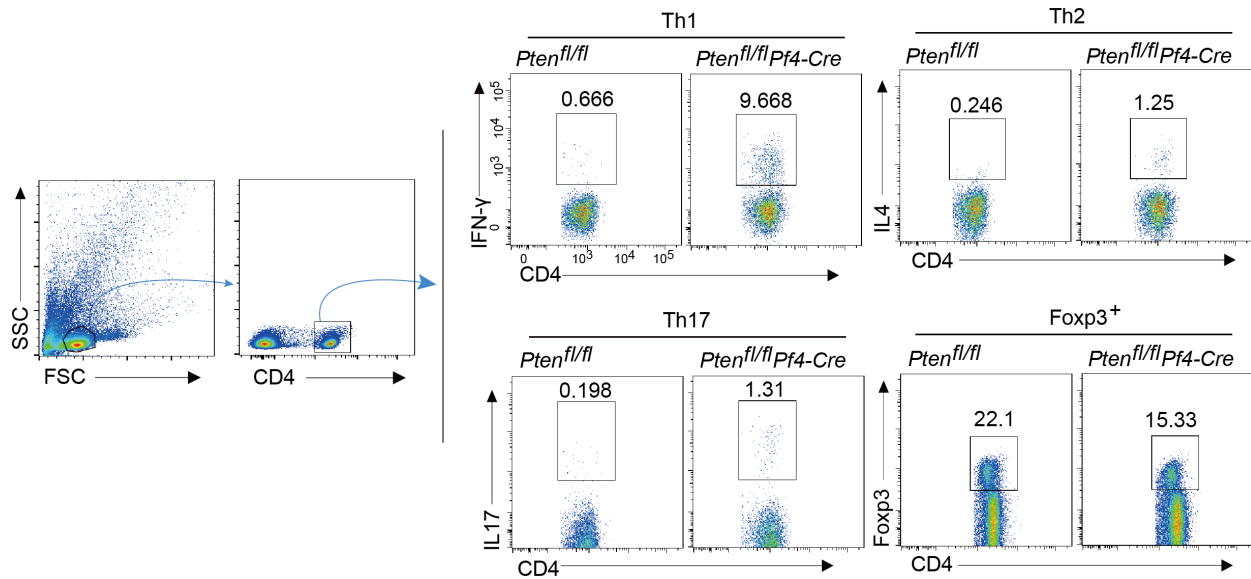

**Supplementary Figure. 2**

16

17 **Supplementary Figure 2 Expansion of IFN $\gamma$ <sup>+</sup>, IL-4<sup>+</sup>, IL17<sup>+</sup> T subsets in pLNs from**  
 18 ***Pten<sup>fl/fl</sup>Pf4-Cre* mice.** The pLNs of 6-month-old mice were subjected for analysis. Representative  
 19 flow cytometry plots of the proportions of IFN $\gamma$ <sup>+</sup>, IL-4<sup>+</sup>, IL17<sup>+</sup> and Foxp3<sup>+</sup> cells among CD4<sup>+</sup> cells  
 20 in the pLNs from *Pten<sup>fl/fl</sup>* and *Pten<sup>fl/fl</sup>Pf4-Cre* mice, respectively. Results are representative of three  
 21 independent experiments.

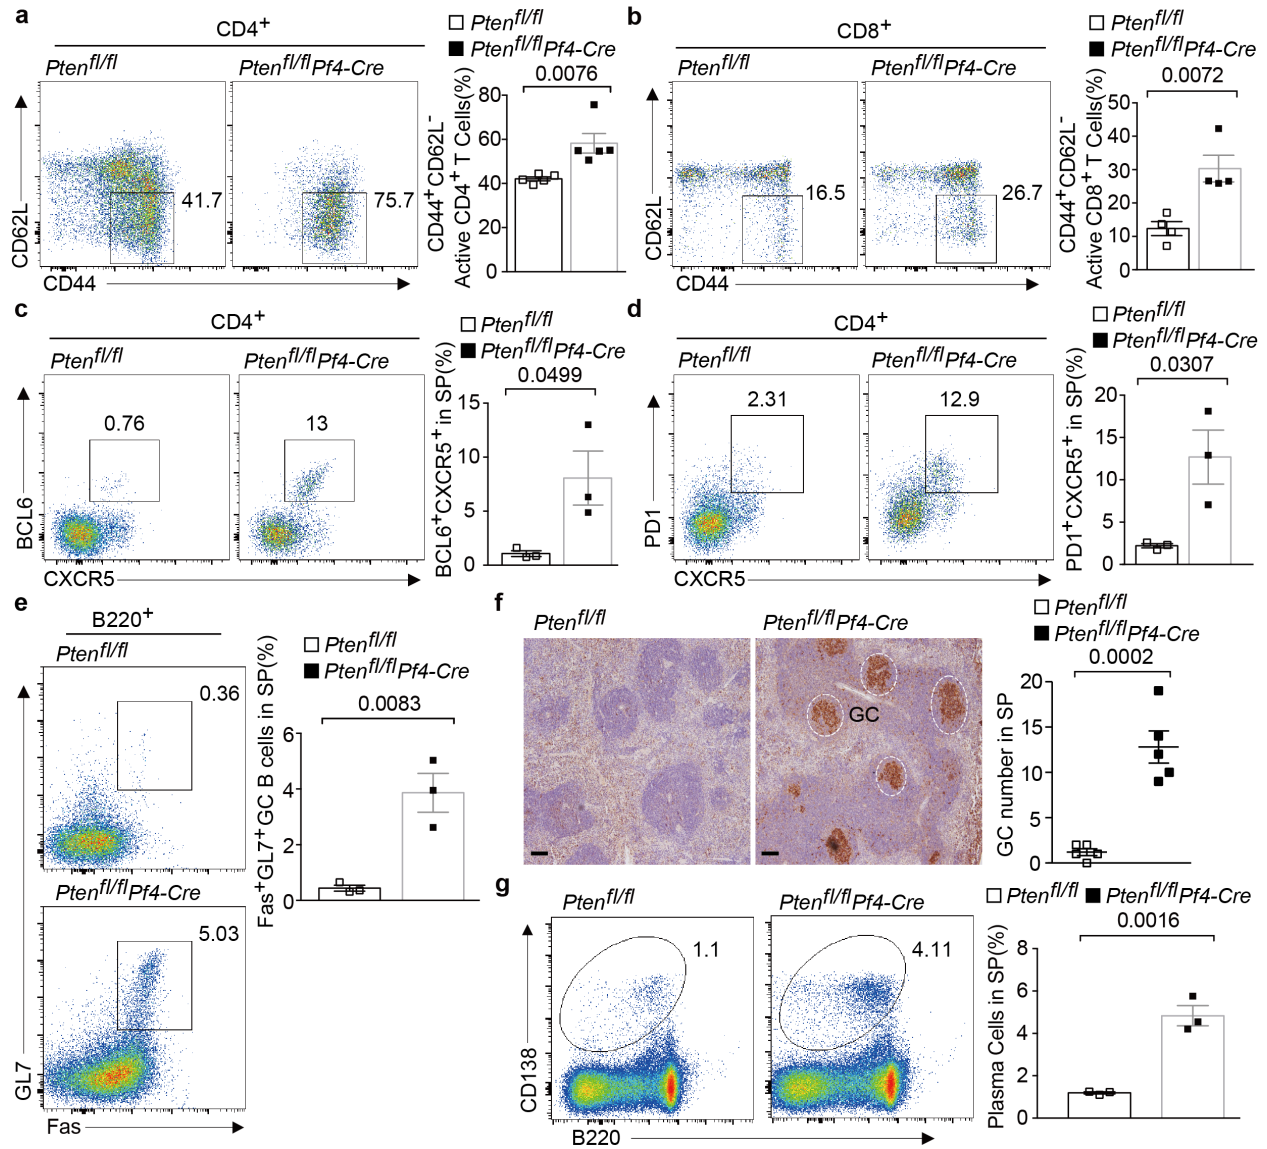

Supplementary Figure. 3

22

23 **Supplementary Figure 3 Altered T cell differentiation and excessive Tfh cell response in the**  
 24 **spleens of *Pten<sup>fl/fl</sup> Pf4-Cre* mice.** The spleens from around 6-month-old *Pten<sup>fl/fl</sup>* and *Pten<sup>fl/fl</sup> Pf4-*  
 25 *Cre* mice were subjected for analysis (a-g). a, b Flow cytometry analysis and quantification of  
 26 CD62L and CD44 expression on CD4<sup>+</sup> (a, n=5/group) or CD8<sup>+</sup> T cells (b, n=4/group). c, d Flow  
 27 cytometry analysis and quantification of CXCR5<sup>+</sup>BCL6<sup>+</sup> Tfh (c, n=3/group) or CXCR5<sup>+</sup>PD1<sup>+</sup>Tfh  
 28 (d, n=3/group) cells (gated on live CD4<sup>+</sup> cells). e Flow cytometry analysis and quantifications of  
 29 Fas<sup>+</sup>GL7<sup>+</sup> GC B cells (gated on live B220<sup>+</sup> cells, n=3/group). f Representative PNA staining of  
 30 splenic sections (Left, scale bars, 100 μm). Germinal centers are identified as PNA-positive  
 31 clusters and circled with white line. Quantifications of the number of GCs per spleen section are  
 32 shown at the right (n=3 biologically independent samples). g Flow cytometry analysis and  
 33 quantification of CD138<sup>+</sup> plasma cells (n=3/group). Data are representative of three independent  
 34 experiments. Each symbol represents one mouse (a-g), and data are presented as mean ± s.e.m. ns,  
 35 not significance. (two-tailed t-test). Source data are provided as a Source Data file.

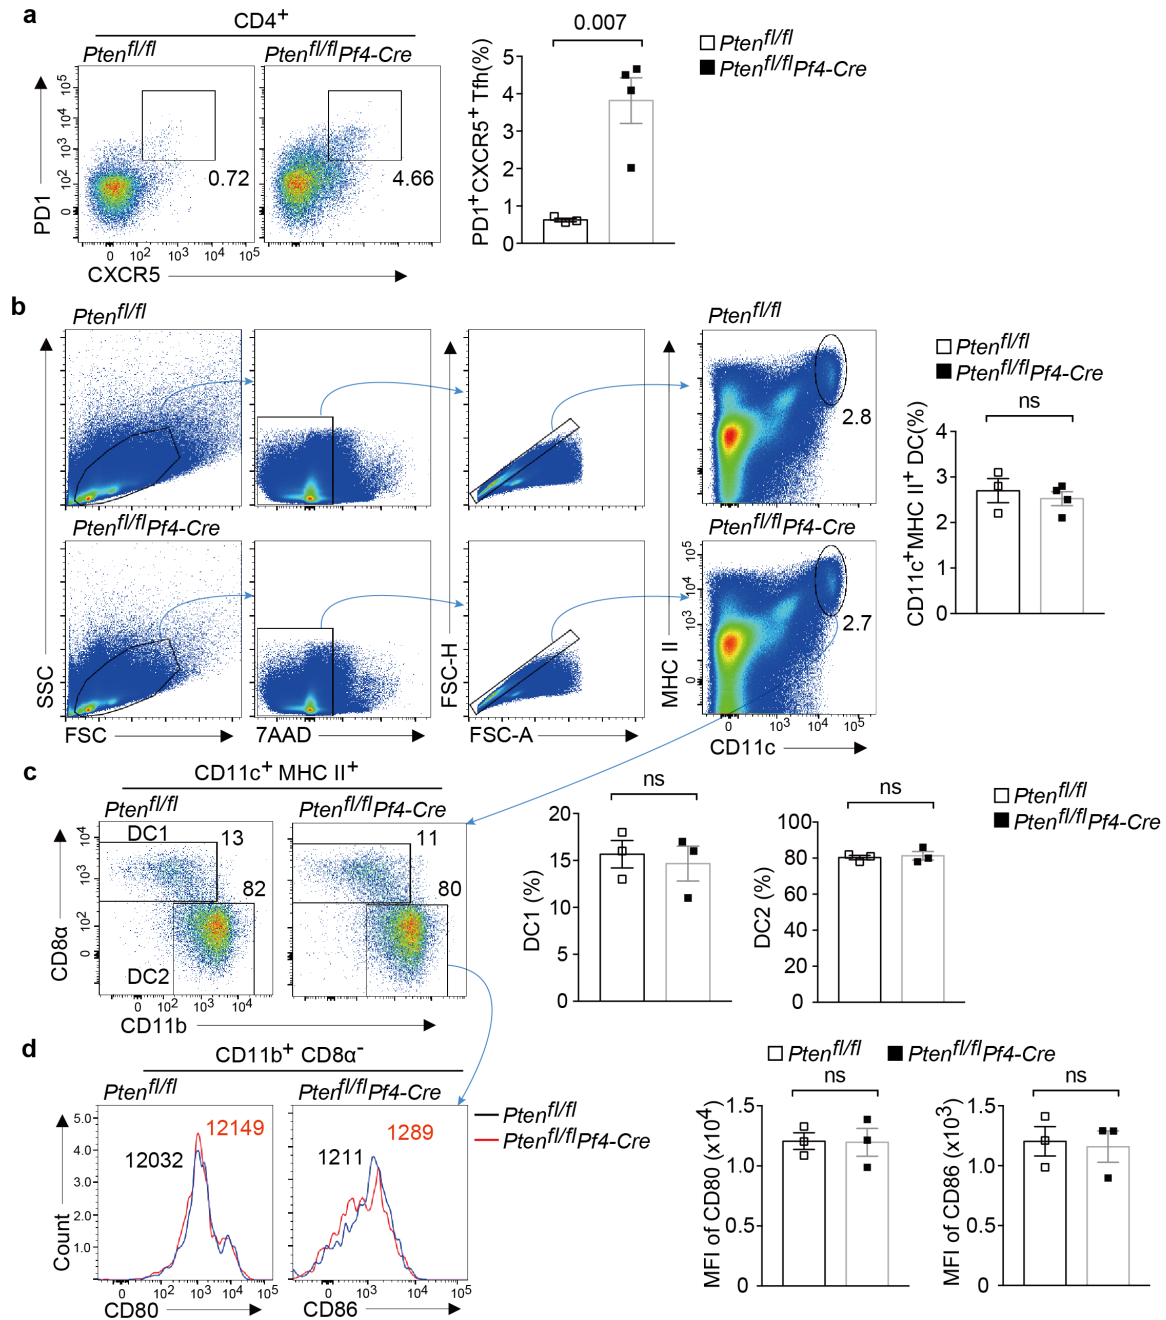

Supplementary Figure. 4

36

37 **Supplementary Figure 4** *Pten<sup>fl/fl</sup>Pf4-Cre* mice displayed normal homeostasis of splenic DCs.

38 The spleens of 3- or 5-month-old mice were subjected for analysis (a-d). **a** Flow cytometry plots  
 39 and quantifications of  $CXCR5^+PD1^+$  Tfh cells (*Pten<sup>fl/fl</sup>* n=3; *Pten<sup>fl/fl</sup>Pf4-Cre* n=4). **b** Flow  
 40 cytometry analysis and frequencies of  $CD11c^+MHC\ II^+$  DCs (*Pten<sup>fl/fl</sup>* n=3; *Pten<sup>fl/fl</sup>Pf4-Cre* n=4).  
 41 **c** Flow cytometry analysis and proportions of cDC1 ( $CD8\alpha^+CD11b^-$ ) and cDC2 ( $CD8\alpha^-CD11b^+$ )  
 42 among DCs (n=3 mice/group). **d** Flow cytometry analysis and quantifications of CD80 and CD86  
 43 expression among cDC2 (n=3 mice/group). Each symbol represents one mouse (a-d), and data are  
 44 presented as mean  $\pm$  s.e.m. ns, not significance. (two-tailed t-test). Results are representative of  
 45 three independent experiments. Source data are provided as a Source Data file.

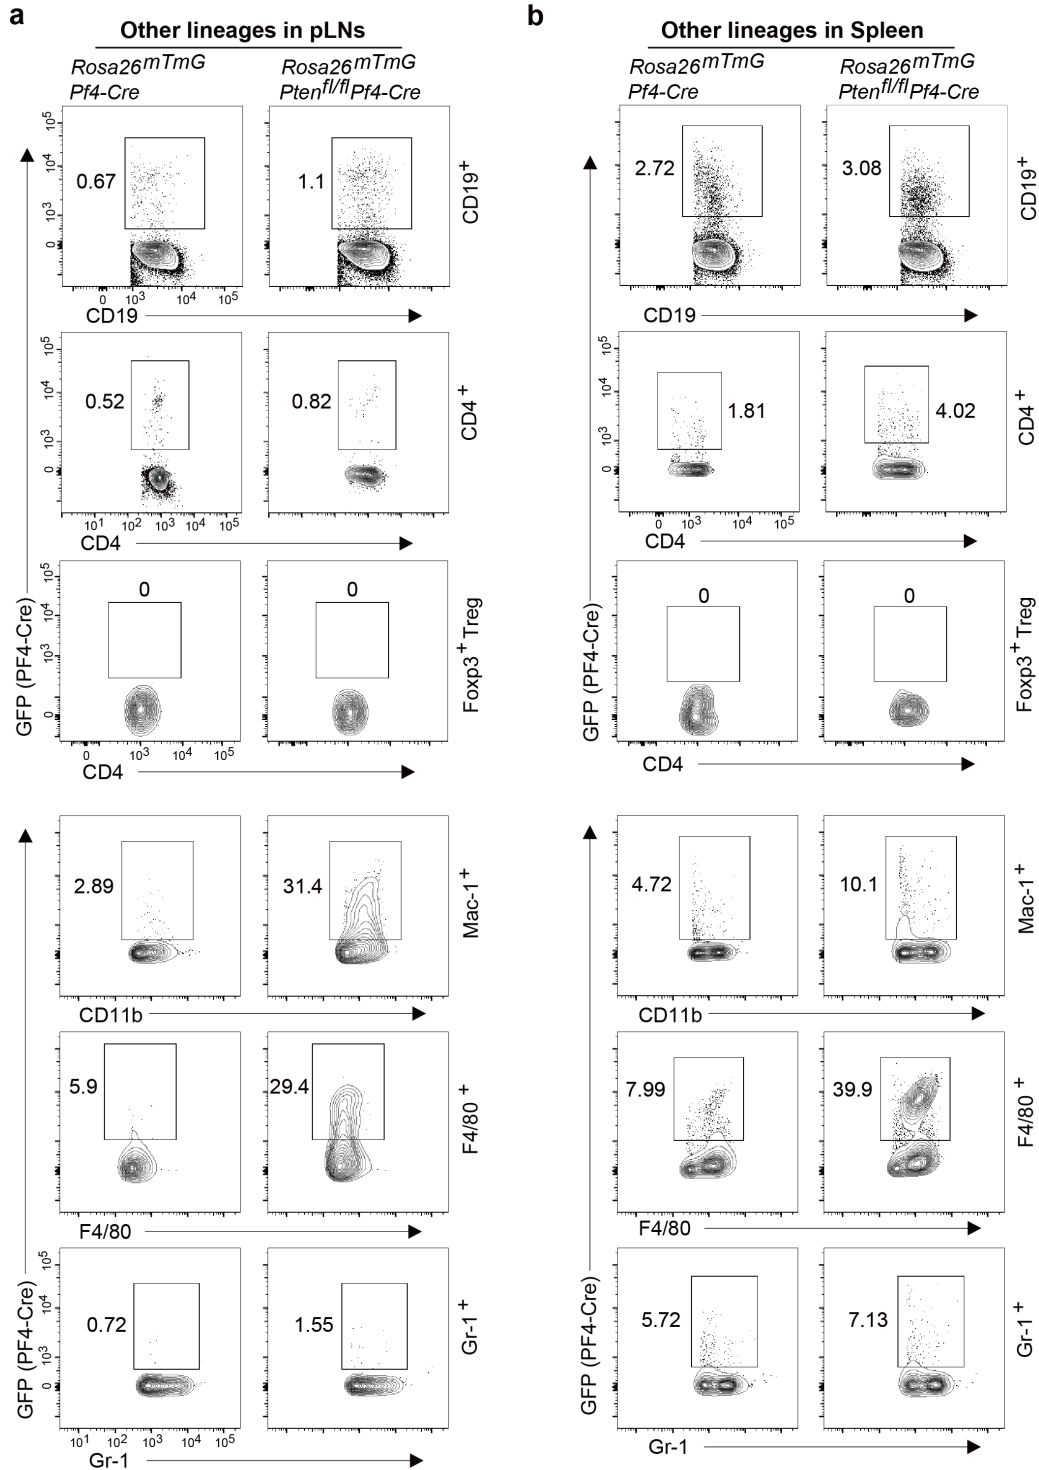

Supplementary Figure 5

46

47 **Supplementary Figure 5** The frequencies of GFP-positive cells in the indicated lineages. The  
 48 pLNs or spleens of 6-month-old mice were subjected for analysis (a-b). a-b Representative flow  
 49 cytometry plots of GFP<sup>+</sup> cells among CD19<sup>+</sup>, CD4<sup>+</sup>, Foxp3<sup>+</sup>, Mac-1<sup>+</sup>, F4/80<sup>+</sup> and Gr-1<sup>+</sup> cells in the  
 50 pLNs (a) or spleens (b) of *Rosa26<sup>mT/mG</sup>Pf4-Cre* and *Rosa26<sup>mT/mG</sup>Pten<sup>fl/fl</sup>Pf4-Cre* mice,  
 51 respectively. Results are representative of three independent experiments.



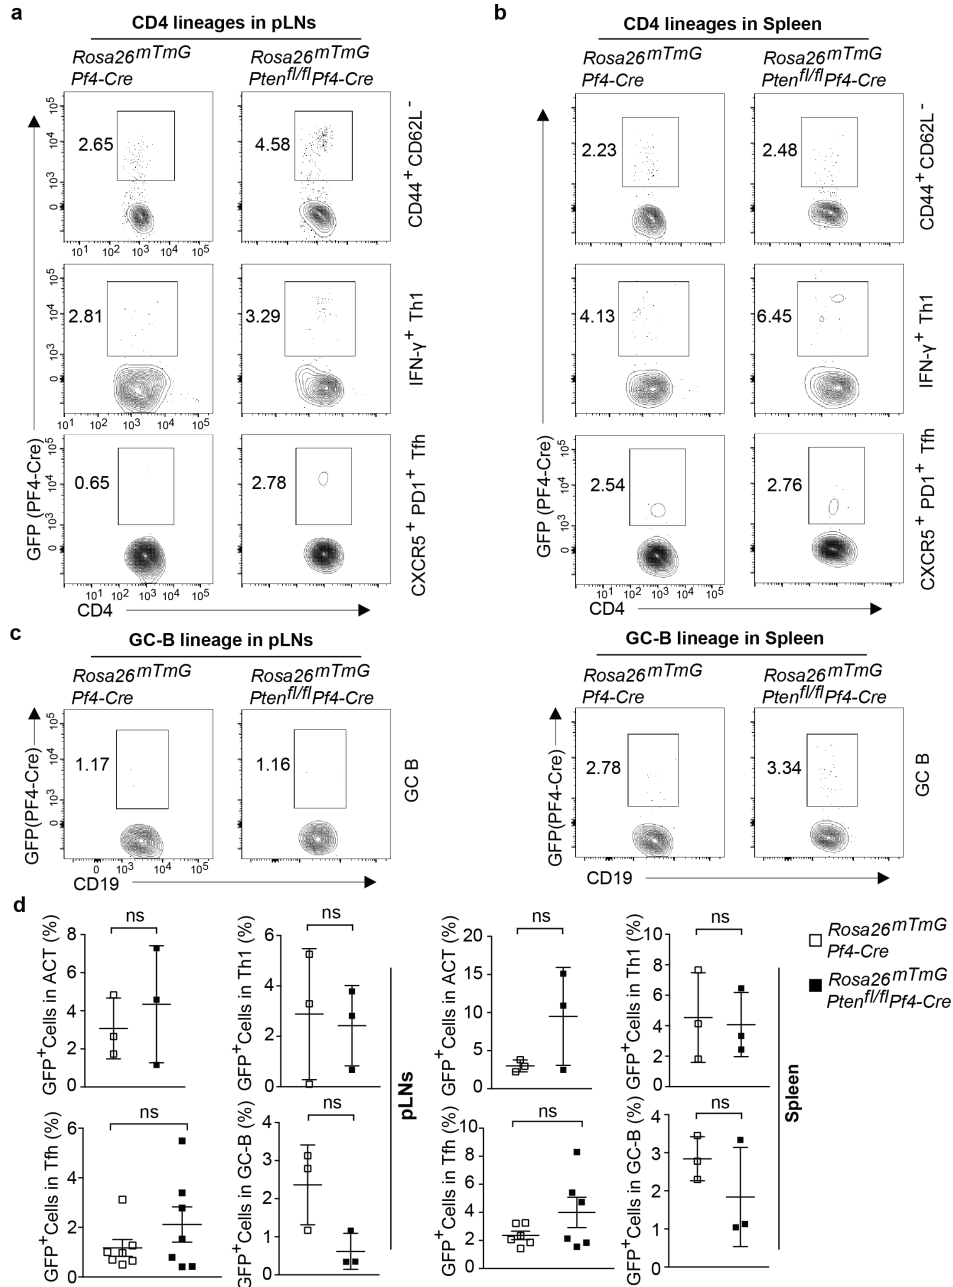

Supplementary Figure. 6

52

53 **Supplementary Figure 6 Nonspecific PTEN deficiency in T/B subsets has a very limited effect**  
 54 **on indicated cell populations.** The pLNs or spleens of 6-month-old mice were subjected for

55 analysis (a-d). a-c Representative flow cytometry plots of GFP<sup>+</sup> cells among CD44<sup>+</sup>CD62L<sup>-</sup> active  
 56 T cell (ACT), IFN- $\gamma$ <sup>+</sup> Th1, and CXCR5<sup>+</sup>PD1<sup>+</sup> Tfh (a, b) and GC-B cells (c) in the pLNs or spleens  
 57 of *Rosa26<sup>mTmG</sup> Pf4-Cre* and *Rosa26<sup>mTmG</sup> Pten<sup>fl/fl</sup> Pf4-Cre* mice, respectively. d Statistical analysis  
 58 of GFP<sup>+</sup> cells among indicated cell lineages in pLNs (ACT, n=3; Th1, n=3; Tfh, n=7; GC B, n=3)  
 59 or spleens (ACT, n=3; Th1, n=3; Tfh, n=7; GC B, n=3) from *Rosa26<sup>mTmG</sup> Pf4-Cre* and  
 60 *Rosa26<sup>mTmG</sup> Pten<sup>fl/fl</sup> Pf4-Cre* mice. Results are representative of three independent experiments and  
 61 each symbol represents one mouse, and data (d) are presented as mean  $\pm$  s.e.m. ns, not significance.  
 62 (two-tailed t-test). Source data are provided as a Source Data file.

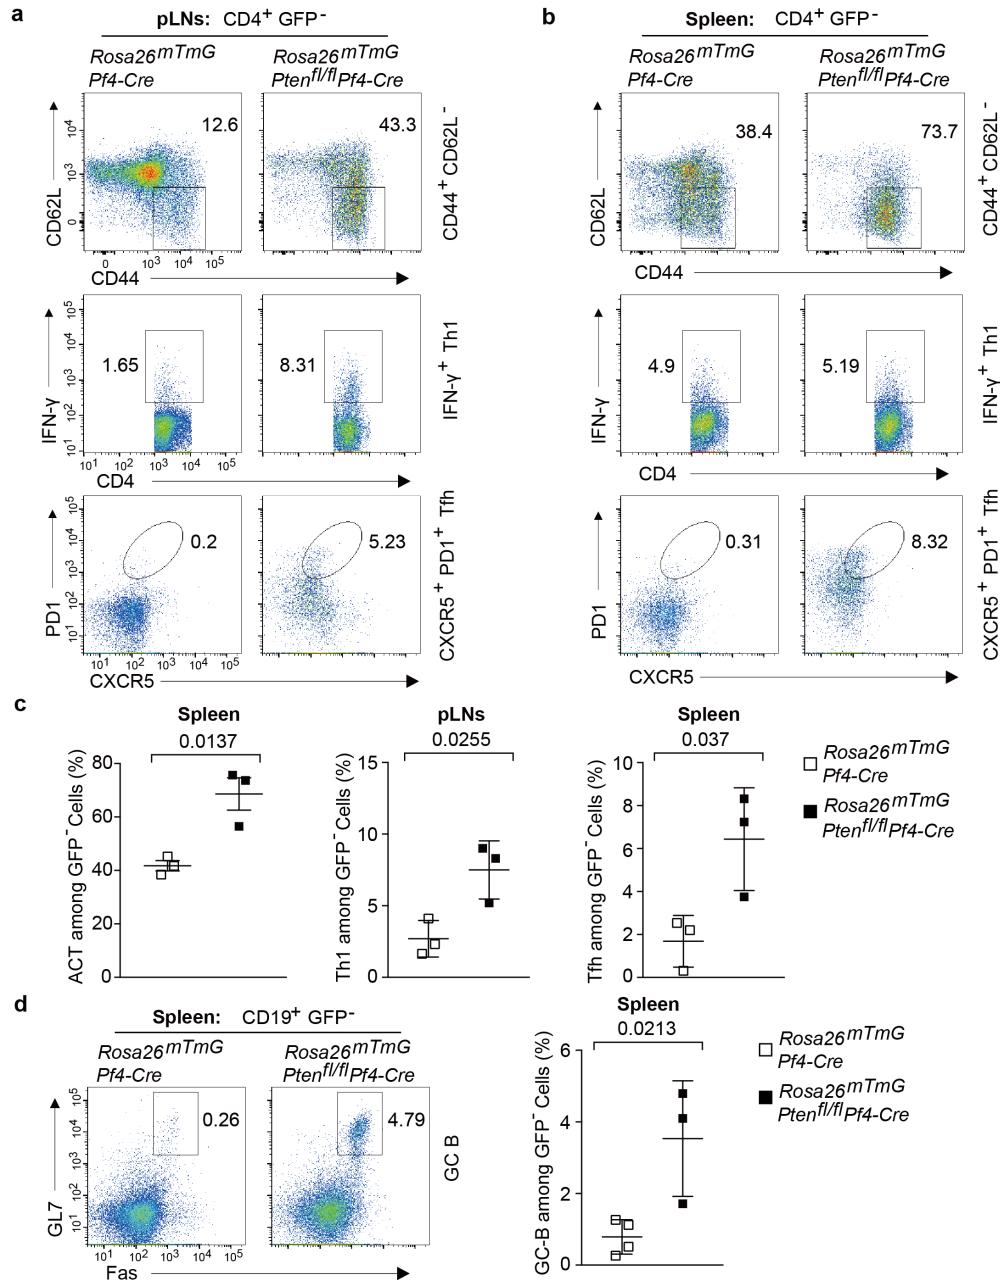

Supplementary Figure. 7

63

64 **Supplementary Figure 7 The expansion of activate, Th1, Tfh and GC-B subsets is cell-**  
 65 **extrinsic.** Around 6-month-old *Pten<sup>fl/fl</sup>* and *Pten<sup>fl/fl</sup> Pf4-Cre* mice were subjected for analysis (a-d).  
 66 a-b Representative flow cytometry plots of CD44<sup>+</sup>CD62L<sup>-</sup> active T cells (ACT), IFN-γ<sup>+</sup> Th1,  
 67 CXCR5<sup>+</sup>PD1<sup>+</sup> Tfh cells among CD4<sup>+</sup>GFP<sup>-</sup> cells in the pLNs (a) and spleens (b) of indicated mice.  
 68 c Quantifications of the percentages of ACT, Th1 and Tfh among CD4<sup>+</sup>GFP<sup>-</sup> cells in pLNs or  
 69 spleens of *Rosa26<sup>mTmG</sup> Pf4-Cre* (n=3) and *Rosa26<sup>mTmG</sup> Pten<sup>fl/fl</sup> Pf4-Cre* (n=3) mice, respectively. d  
 70 Proportions of GL7<sup>+</sup>Fas<sup>+</sup> GC-B cells among B220<sup>+</sup> GFP<sup>-</sup> subsets in spleen of indicated mice (white  
 71 square, n=4; black square, n=3). Data are representative of three independent experiments and each  
 72 symbol represents one mouse, and data (c, d) are presented as mean ± s.e.m. (two-tailed t-test).  
 73 Source data are provided as a Source Data file.



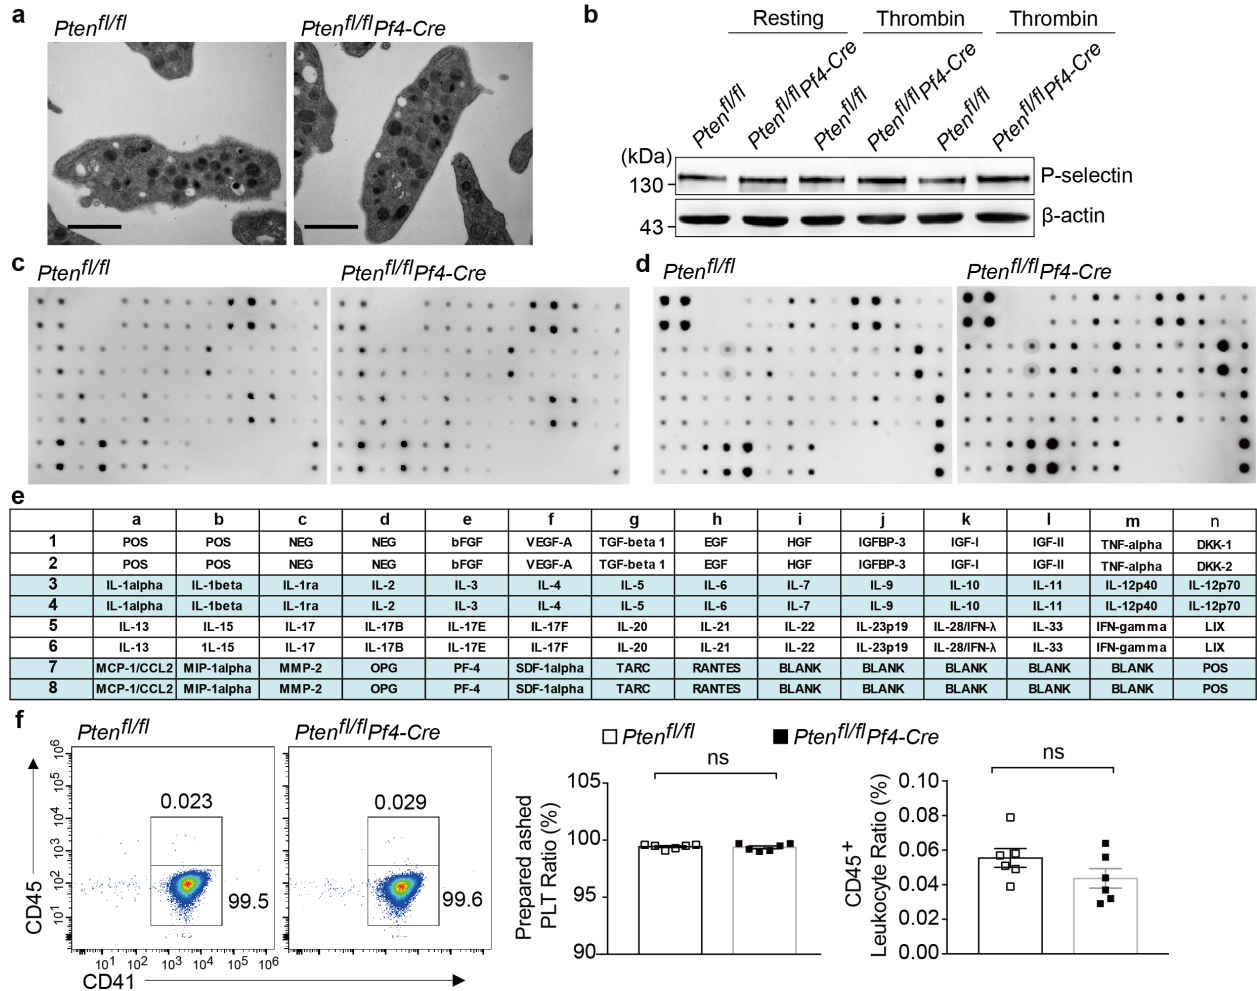

Supplementary Figure. 8

74

75 **Supplementary Figure 8 The production and secretion of cytokines in *Pten<sup>fl/fl</sup>* and *Pten<sup>fl/fl</sup>Pf4-***

76 ***Cre* platelets.** Around 6-month-old *Pten<sup>fl/fl</sup>* and *Pten<sup>fl/fl</sup>Pf4-Cre* mice were subjected for analysis

77 **(a-f).** **a** Representative transmission electron microscopy images of *Pten<sup>fl/fl</sup>* or *Pten<sup>fl/fl</sup>Pf4-Cre*

78 platelets. Scale bars, 1μm. **b** Western blotting of P-selectin expression in *Pten<sup>fl/fl</sup>* or *Pten<sup>fl/fl</sup>Pf4-*

79 ***Cre*** platelets treated with indicated concentrations of Thrombin. **c** Representative images of

80 cytokine arrays of untreated-*Pten<sup>fl/fl</sup>* or *Pten<sup>fl/fl</sup>Pf4-Cre* platelets. **d** Representative images of

81 cytokine arrays of *Pten<sup>fl/fl</sup>* or *Pten<sup>fl/fl</sup>Pf4-Cre* platelets stimulated by 0.1 U/ml Thrombin. **e** The

82 cytokines listed in the array. **f** The purity of prepared platelets, assessed by flow cytometry (n=6

83 per group in each panels). Data are representative of at least three independent experiments, and

84 data **(f)** are presented as mean ± s.e.m. ns, not significance. (two-tailed t-test). Source data are

85 provided as a Source Data file.

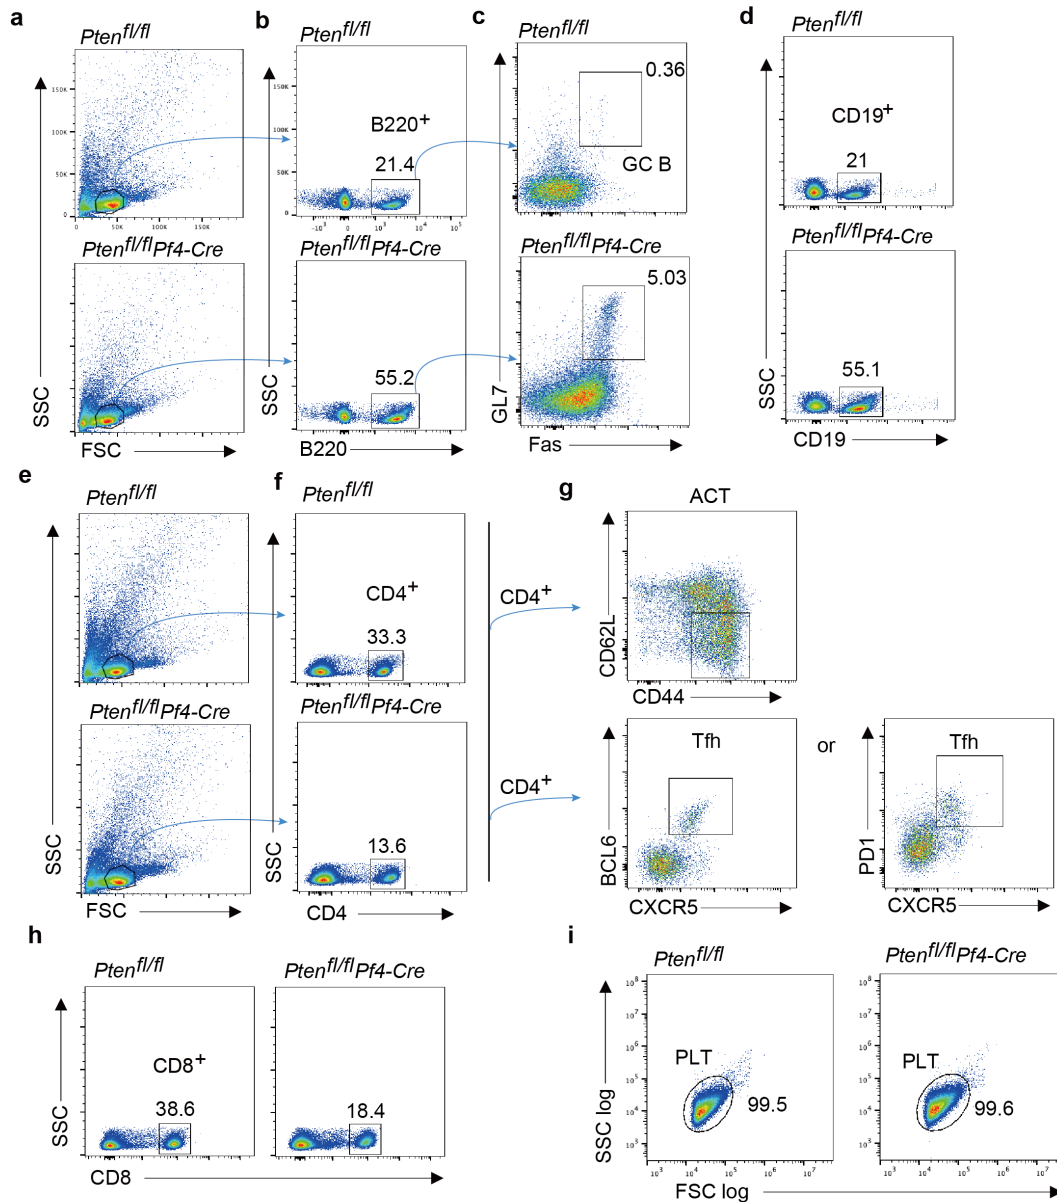

**Supplementary Figure 9**

86  
 87 **Supplementary Figure 9 Gating Strategy used for flow cytometric analysis of GC B cells,**  
 88 **ACT and Tfh cells in the figures.** All cell populations were gated on live singlets. **a-c** Gating  
 89 strategies used for flow cytometric analysis of GC B cells correspond to FACS data panels in  
 90 figure 2e, figure 5f, Supplementary figure 3e. **a** The gating panels correspond to FACS data panels  
 91 in the manuscript figure 1c, figure 2g, figure 5c, Supplementary figure 3g. **a, b** The B220<sup>+</sup> gating  
 92 panels correspond to FACS data panels in the manuscript figure 1d left panel. **a, d** The CD19<sup>+</sup>  
 93 gating panels correspond to FACS data panels in Supplementary figure 5 first row. **e-g** Gating  
 94 strategies used for flow cytometric analysis of ACT or Tfh cells which correspond to FACS data  
 95 panels in figure 2a, d, figure 5e and Supplementary figure 3a, c, d, Supplementary figure 4a. **e, f**  
 96 The CD4<sup>+</sup> gating panels correspond to FACS data panels in the figure 1d right panel, figure 2c,  
 97 figure 5a, b d, Supplementary figure 4a, Supplementary figure 5 second row. **e, h** The CD8<sup>+</sup> gating  
 98 panels correspond to FACS data panels in the figure 2b, Supplementary figure 3b. **i** The gating  
 99 panels correspond to FACS data panels in the figure 4b, 4g, and Supplementary figure 8f.

Gating strategy for flow in Supplementary figure 5

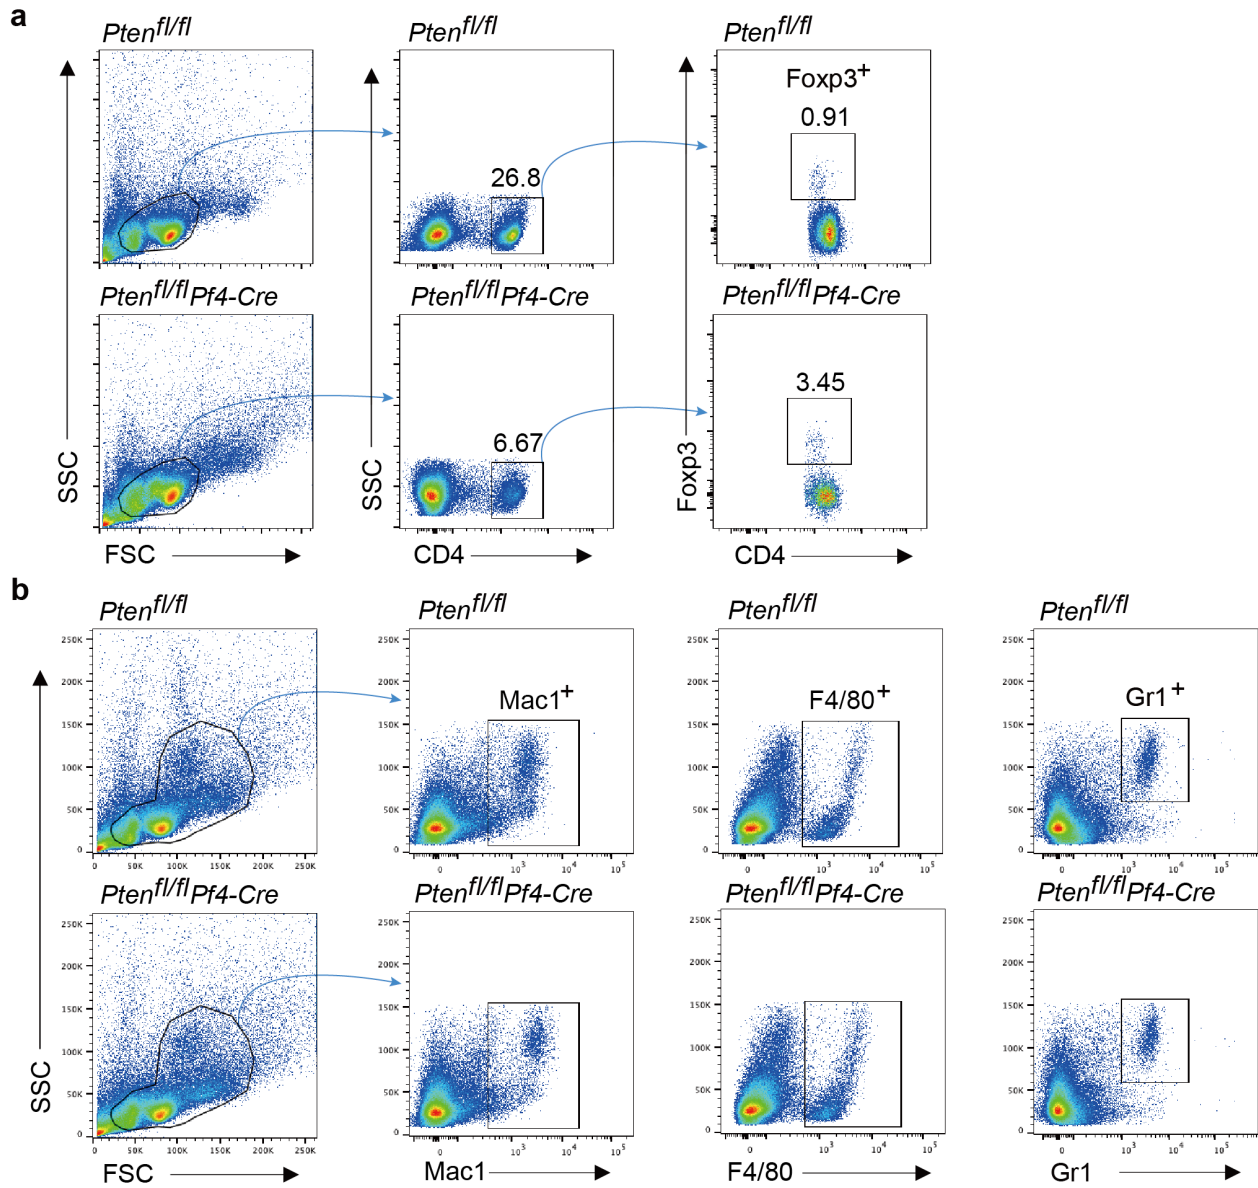

Supplementary Figure. 10

100

101 **Supplementary Figure 10 Gating Strategy** used for flow cytometric analysis in the  
 102 **Supplementary figure 5**. All cell populations were gated on live singlets. **a**, The Foxp3<sup>+</sup> gating  
 103 panels correspond to FACS data panels in Supplementary figure 5 the third row. **b** The Mac1<sup>+</sup>,  
 104 F4/80<sup>+</sup> or Gr1<sup>+</sup> gating panels correspond to FACS data panels in the 4th-6th rows of  
 105 Supplementary figure 5, respectively.

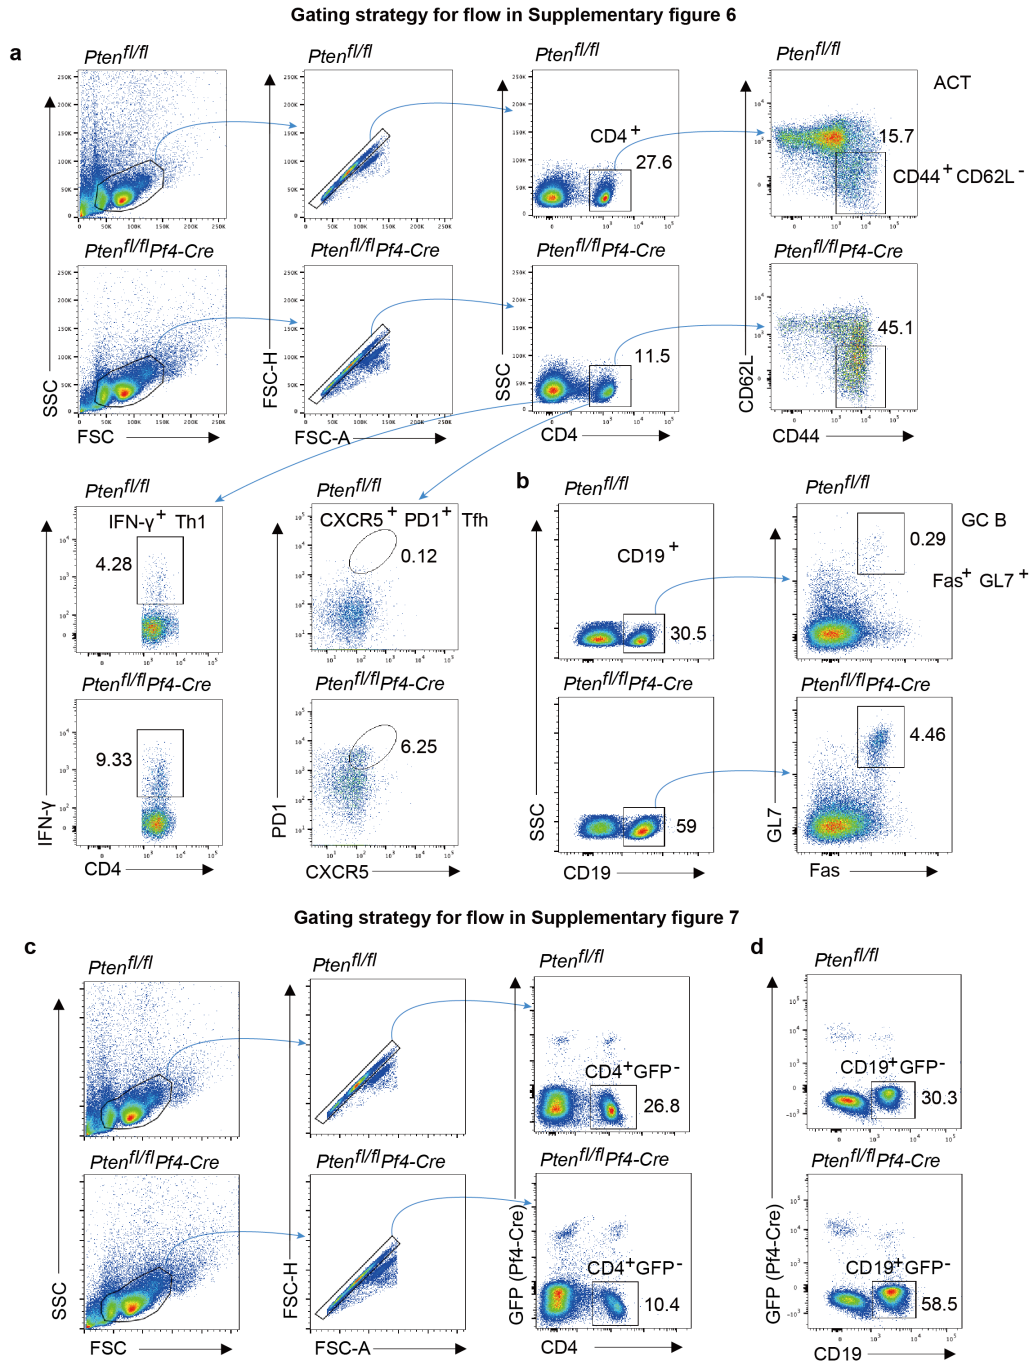

**Supplementary Figure. 11**

106

107

108

109

110

111

112

113

114

**Supplementary Figure 11 Gating Strategy use for flow cytometric analysis in Supplementary figure 6 and 7.** All cell populations were gated on live singlets. **a** The CD4<sup>+</sup> CD44<sup>+</sup> CD62L<sup>-</sup> active T cell (ACT), CD4<sup>+</sup> IFN- $\gamma$ <sup>+</sup> Th1, and CD4<sup>+</sup> CXCR5<sup>+</sup> PD1<sup>+</sup> Tfh gating panels correspond to FACS data panels in the Supplementary figure 6a, b, respectively. **b** The CD19<sup>+</sup> Fas<sup>+</sup> GL7<sup>+</sup> Germinal Center B cells (GC B) gating panels correspond to FACS data panels in the Supplementary figure 6c. **c** The CD4<sup>+</sup> GFP<sup>-</sup> gating panels correspond to FACS data panels in the Supplementary figure 7a, 7b. **d** The CD19<sup>+</sup> GFP<sup>-</sup> gating panels correspond to FACS data panels in the Supplementary figure 7c.

115 **Supplementary Table 1:**

| <b>REAGENT or ANTIBODY</b>      | <b>SOURCE</b>    | <b>IDENTIFIER<br/>Catlog (Cat)</b> | <b>Dilution</b> |
|---------------------------------|------------------|------------------------------------|-----------------|
| <b>Antibodies</b>               |                  |                                    |                 |
| (FITC) anti-B220                | (BD Biosciences) | Cat: 553088                        | 1:100           |
| allophycocyanin (APC) anti-IgM  | (BD Biosciences) | Cat: 550676                        | 1:100           |
| phycoerythrin (PE) anti-CD24    | (BD Biosciences) | Cat: 553262                        | 1:100           |
| FITC anti-CD41                  | (BD Biosciences) | Cat: 553848                        | 1:100           |
| Percp-Cy5.5 anti-BCL6           | (BD Biosciences) | Cat: 562198                        | 1:100           |
| PE-Cy7 anti-CXCR5               | (BD Biosciences) | Cat: 560617                        | 1:100           |
| APC anti-IL4                    | (BD Biosciences) | Cat: 554436                        | 1:200           |
| APC-Cy7 anti-IL17a              | (BD Biosciences) | Cat: 560821                        | 1:100           |
| BV421 anti-IFN- $\gamma$        | (BD Biosciences) | Cat: 563376                        | 1:100           |
| FITC anti P-selectin            | (BD Biosciences) | Cat: 553744                        | 1:100           |
| Pacific Blue anti-CD4           | (Biolegend)      | Cat:100428                         | 1:100           |
| Percp-Cy5.5 anti-CD19           | (Biolegend)      | Cat: 115534                        | 1:100           |
| APC anti-CXCR5                  | (Biolegend)      | Cat:145506                         | 1:100           |
| APC anti-CD44                   | (Biolegend)      | Cat: 103011                        | 1:200           |
| APC-Cy7 anti-CD62L              | (Biolegend)      | Cat: 104427                        | 1:100           |
| PE-Cy7 anti-CD43                | (Biolegend)      | Cat: 121218                        | 1:1000          |
| Pacific Blue anti-GL7           | (Biolegend)      | Cat:144613                         | 1:200           |
| APC anti-Fas/CD95               | (eBioscience)    | Cat: 17-0951-82                    | 1:100           |
| AF700 anti-Foxp3                | (eBioscience)    | Cat: 56-5773-82                    | 1:100           |
| APC anti-Cd42d (GPV)            | (eBioscience)    | Cat: 17-0421-82                    | 1:100           |
| anti-CD16/CD32                  | (Biolegend)      | Cat:101320                         | 1:100           |
| PE CD62L Monoclonal<br>Antibody | (Invitrogen)     | Cat: MA5-17803                     | 1:100           |
| APC anti-Mac1                   | (BD Biosciences) | Cat: BD553312                      | 1:200           |
| PE anti-CD41                    | (BD Biosciences) | Cat: BD558040                      | 1:100           |
| PE anti-CD138                   | (BD Biosciences) | Cat: 561070                        | 1:500           |

|                                                 |                                     |                      |        |
|-------------------------------------------------|-------------------------------------|----------------------|--------|
| PerCP/Cy5.5 anti-mouse F4/80<br>Antibody        | (Biolegend)                         | Cat: 123128          | 1:100  |
| APC/Cy7 anti-mouse CD8a<br>Antibody             | (Biolegend)                         | Cat: 100714          | 1:200  |
| APC anti-mouse CD45<br>Antibody                 | (eBioscience/Invitrogen)            | Cat: 17-0451-82      | 1:200  |
| APC CD41 Monoclonal<br>Antibody                 | (Invitrogen)                        | Cat: 17-0411-82      | 1:100  |
| PE-Cy7 Rat Anti-Mouse Gr-1                      | (BD Biosciences)                    | Cat: 552985          | 1:100  |
| Biotin AH anti-mouse CD11c                      | (eBioscience)                       | Cat: 13-0114-82      | 1:100  |
| PerCP-Cy5.5 Streptavidin                        | (Biolegend)                         | Cat: 405214          | 1:200  |
| FITC anti-mouse MHC II                          | (eBioscience)                       | Cat: 11-5321-81      | 1:100  |
| APC Anti-mouse CD86                             | (eBioscience)                       | Cat: 17-0862-81      | 1:100  |
| PE anti-mouse CD80                              | (eBioscience)                       | Cat: 12-0801-82      | 1:100  |
| PE-Cy7 anti-mouse CD11b                         | (eBioscience)                       | Cat: 25-0112-81      | 1:100  |
| anti-AKT-Thr308                                 | (Cell Signaling<br>Technology, CST) | Cat: 9275L           | 1:1000 |
| anti-AKT-Ser473                                 | (CST)                               | Cat: 4060            | 1:1000 |
| anti-SNAP23-Ser95                               | (GenScript)                         | Order No.:C7010CG250 | 1:1000 |
| anti-Sin1-Thr86                                 | (CST)                               | Cat: 14716s          | 1:500  |
| anti-SNAP23                                     | (Proteintech)                       | Cat: 10825-1-AP      | 1:500  |
| anti-PTEN                                       | (CST)                               | Cat: 9559L           | 1:1000 |
| Rabbit anti-GAPDH                               | (CST)                               | Cat: 2118s           | 1:1000 |
| anti-CD62P (P-selectin)<br>antibody             | (Abcam)                             | Cat: ab255822        | 1:1000 |
| Biotinylated Peanut Agglutinin                  | (Vector<br>laboratories)            | Cat: B-1075          | 1:200  |
| anti-B220                                       | (Biolegend)                         | Cat:103202           | 1:100  |
| Alexa Fluor 647 conjugated<br>Goat anti-Rat IgG | (Life<br>Technologies)              | Cat: A21247          | 1:500  |



|                                                    |                                        |                     |         |
|----------------------------------------------------|----------------------------------------|---------------------|---------|
| APC Streptavidin                                   | (BD Biosciences)                       | Cat: 554067         | 1:500   |
| Purified anti-mouse CD4<br>Antibody                | (Biolegend)                            | Cat:100401          | 1:200   |
| anti-CD31                                          | (BD Biosciences)                       | Cat: 550274         | 1:100   |
| Mouse LYVE-1 Biotinylated<br>Antibody              | (R&D Systems)                          | Cat: BAF2125        | 1:100   |
| PE conjugated Goat anti-rat IgG                    | (Rockland)                             | Cat: 612-108-120    | 1:250   |
| Goat anti-rabbit IgG (H+L) HRP<br>conjugated       | (Invitrogen)                           | Cat: A16110         | 1:10000 |
| AP-conjugated anti-mouse IgG                       | (Jackson<br>ImmunoResearch)            | Cat: 115-055-146    | 1:500   |
| anti- $\beta$ -Actin antibody                      | (Bioworld)                             | Cat: AP0060         | 1:10000 |
| <b>Commercial Reagents</b>                         |                                        |                     |         |
| Apyrase                                            | (Sigma)                                | Cat: A6535-2KU      |         |
| PGE1                                               | (Sigma)                                | Cat: P5515          |         |
| ADP                                                | (Amersco)                              | Cat: 0160           |         |
| human alpha Thrombin                               | (Enzyme research<br>south bend in USA) | Cat: HT 4082A       |         |
| Collagen                                           | (Chrono Log<br>CHRONO-PAR®)            | Cat: NC9533954      |         |
| PDK1 Inhibitor II                                  | (Calbiochem)                           | Cat: 521276         |         |
| PP242 hydrate                                      | (Sigma)                                | Cat: P0037          |         |
| AKT Inhibitor III (SH6)                            | (Merck)                                | Cat: 124009         |         |
| ProLong Gold antifade<br>reagent-special packaging | (Invitrogen)                           | Cat: P36934         |         |
| Protease Inhibitor Cocktail                        | (Roche Life Science)                   | Cat: 04 693 132 001 |         |
| Phosphatase Inhibitor Cocktail                     | (Roche Life Science)                   | Cat: 04 096 837 001 |         |
| anti-CD3 functional grade                          | (Invitrogen)                           | Cat: 16-0031-85     |         |
| anti-CD28 functional grade                         | (Invitrogen)                           | Cat: 16-0281-85     |         |

117 Source data for the blot in Supplementary Figure 8b

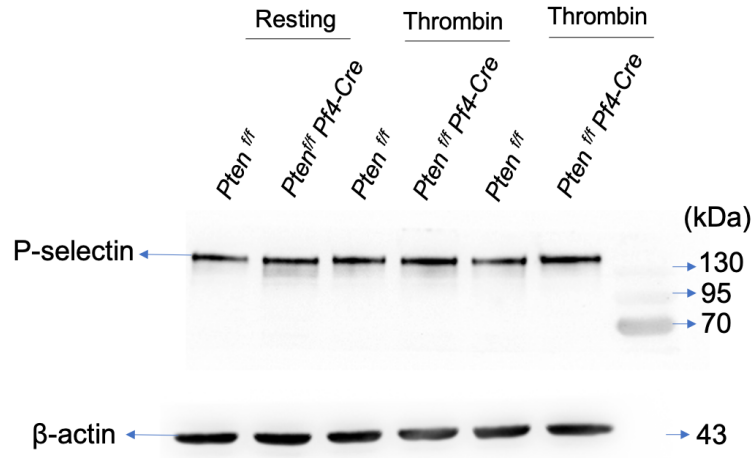

118
